# Supplementary material
Source: Springer Nature journal article supplement (https://www.springermedizin.de/resource/supplementary/12962_2013_184_MOESM1_ESM.pdf/9571858)

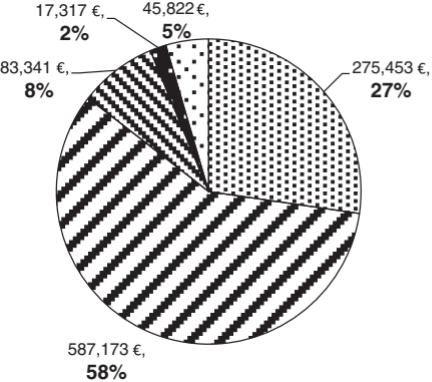

- Personnel
- Program costs
- Logistics
- Local office
- Community

Supplement: MOESM1 [file 9571858]
